# Supplementary material for: Discovery of fungal surface NADases predominantly present in pathogenic species
Source: PubMed Central journal article supplement (PMC7955114; doi:10.1038/s41467-021-21307-z), 2021-03-12
Supplement: 41467_2021_21307_MOESM1_ESM.pdf [file 41467_2021_21307_MOESM1_ESM.pdf]

## Supplementary Information

### Discovery of fungal surface NADases predominantly present in pathogenic species

Øyvind Strømmland<sup>1</sup>, Juha P. Kallio<sup>1</sup>, Annica Pschibul<sup>2</sup>, Renate H. Skoge<sup>3</sup>, Hulda M. Harðardóttir<sup>3</sup>, Lars J. Sverkeli<sup>1,3</sup>, Thorsten Heinekamp<sup>2</sup>, Olaf Kniemeyer<sup>2,3</sup>, Marie Migaud<sup>4</sup>, Mikhail V. Makarov<sup>4</sup>, Toni I. Gossmann<sup>5,6</sup>, Axel Brakhage<sup>2,7</sup>, Mathias Ziegler<sup>1\*</sup>

**Supplementary table 1. Data Collection, Phasing, and Refinement Statistics**

| Structure                                        | AfNADase:apo         | AfNADase:ADPR-Nam                               | AfNADase:BAD           |
|--------------------------------------------------|----------------------|-------------------------------------------------|------------------------|
| PDB accession code                               | 6YGE                 | 6YGF                                            | 6YGG                   |
| <b>Data collection</b>                           |                      |                                                 |                        |
| Synchrotron/beamline                             | PETRAIII, EMBL/P13   | PETRAIII, DESY/P11                              | DLS/I04-1              |
| Space group                                      | P 32 2 1             | P 32 2 1                                        | P 21 21 21             |
| Cell dimensions a, b, c (Å)                      | 63.79, 63.79, 257.99 | 63.82, 63.82, 257.72                            | 51.05, 64.32, 161.01   |
| Angles $\alpha$ , $\beta$ , $\gamma$ (°)         | 90, 90, 120          | 90, 90, 120                                     | 90, 90, 90             |
| Resolution (Å) <sup>a</sup>                      | 54.0-1.6 (1.657-1.6) | 42.9-1.7 (1.76-1.7)                             | 48.6-1.85 (1.916-1.85) |
|                                                  | (1.657-1.6)          | (1.76-1.7)                                      | (1.916-1.85)           |
| Total reflections                                | 672818 (50757)       | 136212 (12968)                                  | 303366 (30838)         |
| Unique reflections                               | 75947 (7267)         | 68236 (6579)                                    | 45536 (4447)           |
| Multiplicity                                     | 8.9 (7.0)            | 2.0 (2.0)                                       | 6.7 (6.9)              |
| Completeness (%)                                 | 92.8 (90.3)          | 99.7 (97.8)                                     | 98.5 (97.7)            |
| I/ $\sigma$ (I)                                  | 16.5 (0.7)           | 15.2 (1.0)                                      | 9.3 (0.95)             |
| Wilson B-factor                                  | 29.5                 | 27.5                                            | 25.7                   |
| R-merge                                          | 5.9 (168.8)          | 2.5 (64.4)                                      | 14.3 (165.8)           |
| R-pim                                            | 1.9 (61.0)           | 2.5 (64.4)                                      | 5.9 (67.5)             |
| CC 1/2                                           | 0.99 (0.39)          | 0.99 (0.48)                                     | 0.998 (0.51)           |
| <b>Refinement</b>                                |                      |                                                 |                        |
| R <sub>work</sub>                                | 17.8 (33.3)          | 16.9 (34.3)                                     | 18.4 (34.0)            |
| R <sub>free</sub>                                | 21.1 (35.4)          | 20.1 (36.1)                                     | 22.5 (35.70)           |
| Number of non-hydrogen atoms                     | 3970                 | 4173                                            | 3998                   |
| Macromolecules                                   | 3322                 | 3346                                            | 3302                   |
| Ligands                                          | 171                  | 263                                             | 237                    |
| Solvent                                          | 477                  | 564                                             | 459                    |
| R.m.s.d (bonds/angles)                           | 0.007/0.88           | 0.007/0.86                                      | 0.008/0.96             |
| Ramachandran favored (%)                         | 98.30                | 98.79                                           | 98.55                  |
| Ramachandran allowed (%)                         | 1.70                 | 1.21                                            | 1.21                   |
| Ramachandran outliers (%)                        | 0                    | 0                                               | 0.24                   |
| Clashscore                                       | 2.95                 | 3.29                                            | 3.68                   |
| Average B-factor                                 | 39.8                 | 35.2                                            | 32.7                   |
| Macromolecules                                   | 37.4                 | 31.2                                            | 30.0                   |
| Ligands (including carbohydrates and substrates) | 59.7                 | 69.4                                            | 54.2                   |
|                                                  |                      | <i>ADPR only: 73.1</i><br><i>Nam only: 33.1</i> | <i>BAD only: 36.8</i>  |
| Solvent                                          | 49.1                 | 43.3                                            | 41.0                   |

<sup>a</sup> Data for the highest resolution shell are given in parentheses

**Supplementary Table 2. Structural alignment of *Af*NADase to various NADases and ADP-ribose transferase using PDBeFOLD.**

| <b>Protein</b>   | <b>PDB</b> | <b>Z score</b> | <b>RMSD (Å)</b> | <b>Nalgn</b> | <b>Seq. ID (%)</b> |
|------------------|------------|----------------|-----------------|--------------|--------------------|
| Mtb CpnT TNT     | 4QLP       | 10.7           | 1.93            | 134          | 27                 |
| Tse6             | 4ZV0       | 8.5            | 2.13            | 90           | 21                 |
| Diphtheria toxin | 1TOX       | 5              | 2.71            | 71           | 11                 |
| Cholera toxin    | 1XTC       | 4.3            | 3.26            | 57           | 9                  |
| SPN              | 3PNT       | 3.6            | 3.61            | 73           | 5                  |
| PARP1            | 4DQY       | 2.9            | 3.48            | 75           | 9                  |

The table shows the summary of PDBeFOLD results of pairwise structural comparison of *Af*NADase and selected NADases and ADPR transferases. The Z-score measures the significance of a match in terms of Gaussian statistics. The root-means-square deviation in angstrom (RMSD), the length of the aligned segment (Nalgn) and the fraction of identical residues in the aligned segment (Seq. ID (%)) are shown.

**Supplementary Table 3. Primers used in the study.**

| <b>Primer</b>                                           | <b>Sequence (5'-3')</b>                                    |
|---------------------------------------------------------|------------------------------------------------------------|
| <b>Generation of <i>A. fumigatus</i> strains</b>        |                                                            |
| 6G14470_5for                                            | GGTCATTGTAAATATCTGGG                                       |
| 6G14470_ptrArev                                         | GGCCTGAGTGGCCATCGAATTCCGCCGTGTAATACTGA<br>GAAG             |
| 6G14470_ptrAfor                                         | GAGGCCATCTAGGCCATCAAGCCTTATGGGAAGTGGAT<br>CTTG             |
| 6G14470_3rev                                            | GTAGTGGATAACGAAGATTCCG                                     |
| ptrA-for                                                | GAATTCGATGGCCACTCAGGCC                                     |
| ptrA-rev                                                | GCTTGATGGCCTAGATGGCCTC                                     |
| 14470_fwd                                               | AGGCGTATCACGAGGCCCTTTCGTGCGTCATTGTAAAT<br>ATCTGGG          |
| 14470_rev                                               | CAATAGTGCCACGCTATTGGGATCACTGGC                             |
| hph_fwd                                                 | TGATCCCAATAGCGTGGCACTATTGATCATCC                           |
| hph_rev                                                 | GGCCATCGAATTCGCCAGTGTGCTGGAATTC                            |
| compl_ptrA_fwd                                          | CAGCACACTGGCGAATTCGATGGCCACTCAG                            |
| compl_ptrA_rev                                          | TCACCGTCATCACCGAAACGCGCGAGCTTGATGGCCTA<br>GATGG            |
| <b>Generation of AfNADase insect expression plasmid</b> |                                                            |
| AfNADaseFw_1                                            | CAGGGACCCGGTATGATCTTCACCAACGCCATTCTGGT<br>GATTAGCGCC       |
| AfNADaseRv_233                                          | GAAACAGCACTGCCTGATTCCGCCCCCGGAGTATACGGA<br>TTTCG           |
| <b>Generation of AfNADase 293 expression plasmid</b>    |                                                            |
| AfNADase293Fw                                           | GTTGGATCCCCACCATGATCTTCACCAAC                              |
| AfNADase293Rv                                           | GCATAGAATTCCTAGTGATGGTGATGGTGATGCTGATT<br>CGGCCCCGGAGTATAC |
| <b>Generation of AfNADase mutants</b>                   |                                                            |
| F137AFw                                                 | GTATGGCACCGCTCTGGCGCCGC                                    |
| F137ARv                                                 | TCCGATCCGAAACGGTCAAG                                       |
| Q194AFw                                                 | GATGGGGACGGCTTTCGTGACATATACCAATG                           |
| Q194ARv                                                 | CCTGGCTGCTCAAACCAA                                         |
| Q194KFw                                                 | GATGGGGACGAAGTTCGTGACAT                                    |
| Q194KRv                                                 | CCTGGCTGCTCAAACCAAG                                        |
| R129AFw                                                 | GAAGCTTGACGCGTTCCGGATCGGAGTATGG                            |
| R129ARv                                                 | ATGCCAACCGGTAAGGTC                                         |
| F130AFw                                                 | GCTTGACCGTGCGGGATCGGAGTATG                                 |
| F130ARv                                                 | TTCATGCCAACCGGTAAG                                         |
| D219A/E220AFw                                           | GAGCGAGTATGCTGCCAAGGTGGAATACTC                             |
| D219A/E220ARv                                           | TCATCCAACCGTCGCAAG                                         |

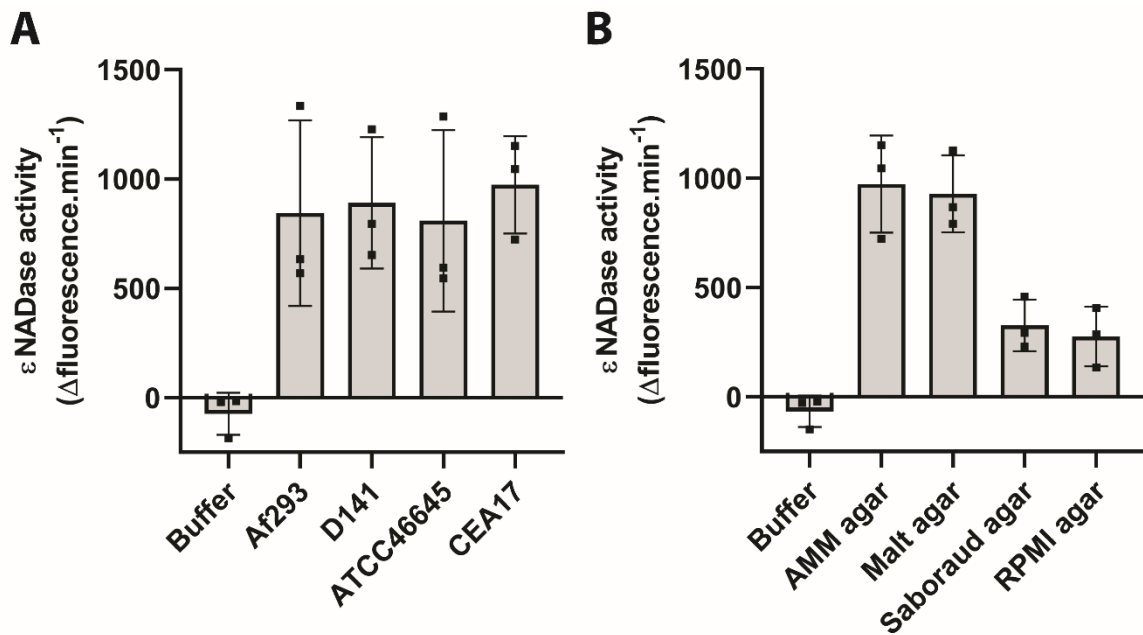

**Supplementary Figure 1. NADase activity of conidia from clinical *A. fumigatus* strains and conidia grown on different media.** (A) NADase activity of *A. fumigatus* conidia from the clinical isolates Af293, D141, ATCC46645 and the laboratory strain CEA17 $\Delta$ *akuB* demonstrated by a fluorometric assay using  $\epsilon$ NAD, n=3. Data are presented as mean values  $\pm$  SEM. (B) NADase activity of *A. fumigatus* conidia from the strain CEA17 $\Delta$ *akuB* cultivated on different media demonstrated by a fluorometric assay using  $\epsilon$ NAD, n=3. Data are presented as mean values  $\pm$  SEM. Experiments in A and B were performed independently three times with similar results. Source data are provided as a Source Data file.

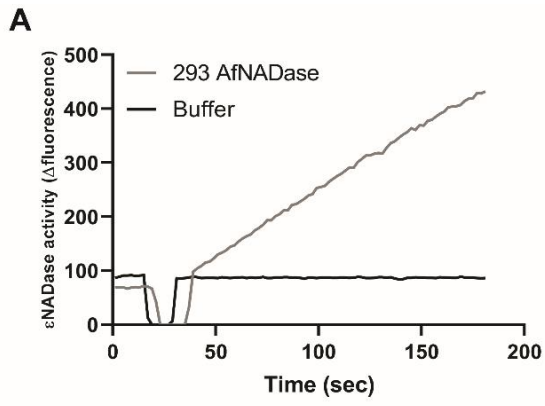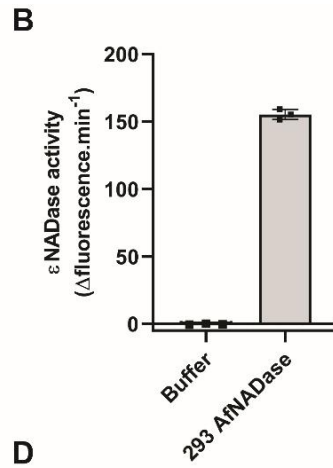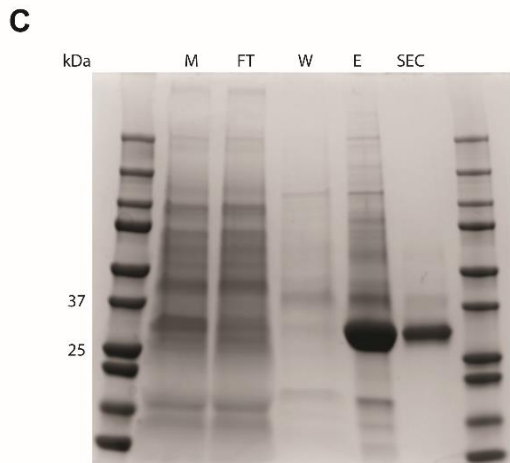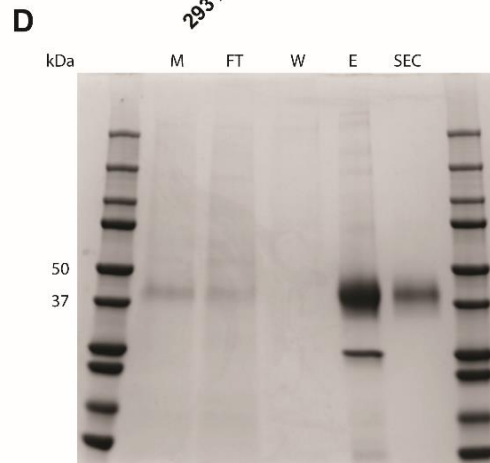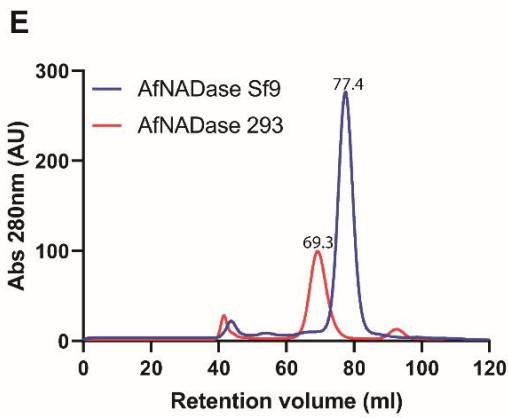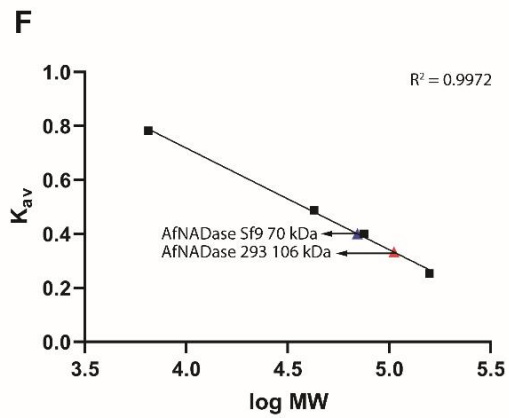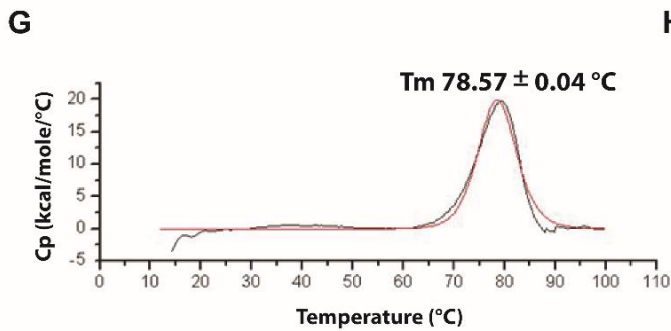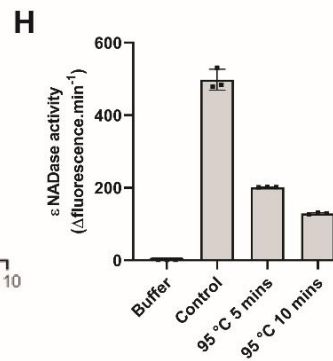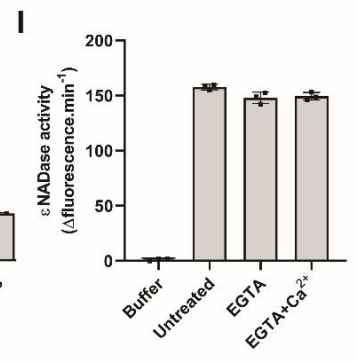

**Supplementary Figure 2. Purification and characterization of *Af*NADase expressed in 293 and Sf9 insect cells.** (A and B). NADase activity of *Af*NADase purified from 293 cells measured using  $\epsilon$ NAD, n=3. Data are presented as mean values +/- SEM. (C) Coomassie blue-stained SDS-PAGE of *Af*NADase expressed in Sf9 insect cells purified by immobilized metal affinity chromatography (IMAC) and size exclusion chromatography (SEC). M: medium, FT: flow through, W: wash, E: Elution from IMAC column, SEC: pooled fraction from the SEC column n=3. (D) Coomassie blue-stained SDS-PAGE showing *Af*NADase expressed in 293 cells purified by IMAC and size exclusion chromatography. M: medium, FT: flow through, W: wash, E: Elution from IMAC column, SEC: pooled fraction from the SEC column n=3. (E) Size exclusion chromatography elution profiles of *Af*NADase purified from 293 and Sf9 cells. (F) The size of *Af*NADase purified from 293 and Sf9 cells was determined by comparing their partition coefficient ( $K_{av}$ ) to a standard of proteins with known sizes (E and F). NADase activity of *Af*NADase purified from 293 cells measured using  $\epsilon$ NAD, n=3. Data are presented as mean values +/- SEM. (G) Differential scanning calorimetry of *Af*NADase purified from Sf9 cells, black: experimental data, red: fitted model. Experiments in A-G were performed independently three times with similar results. (H) NADase activity of *Af*NADase following incubation at 95 °C for 5 and 10 minutes, n=3. Data are presented as mean values +/- SEM. (I) NADase activity of recombinant *Nc*NADase from S293 cells treated with EGTA or EGTA and calcium chloride, n=3. Data are presented as mean values +/- SEM. Source data are provided as a Source Data file.

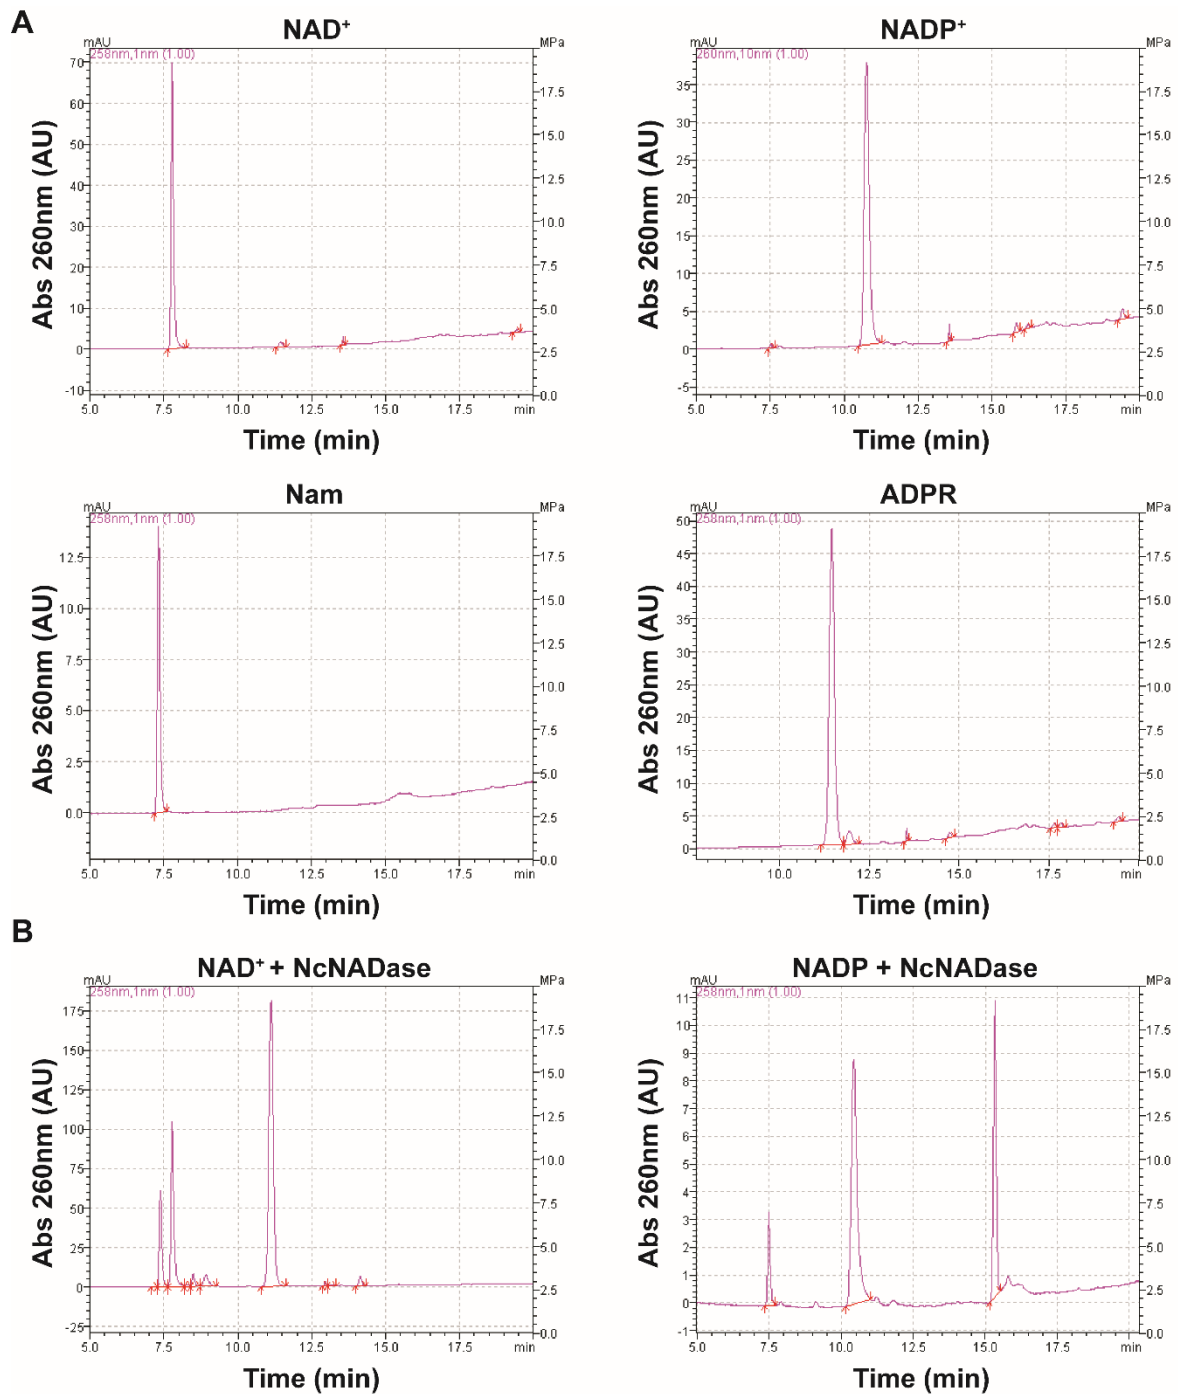

**Supplementary Figure 3. HPLC elution profile of NAD<sup>+</sup>, NADP<sup>+</sup> and NcNADase hydrolysis products.** (A) NAD<sup>+</sup>, NADP<sup>+</sup>, Nam and ADPR standards (B) NAD<sup>+</sup> and NADP<sup>+</sup> hydrolysis mediated by recombinant NcNADase expressed and purified from 293 cells. The experiment was repeated independently three times with similar results.



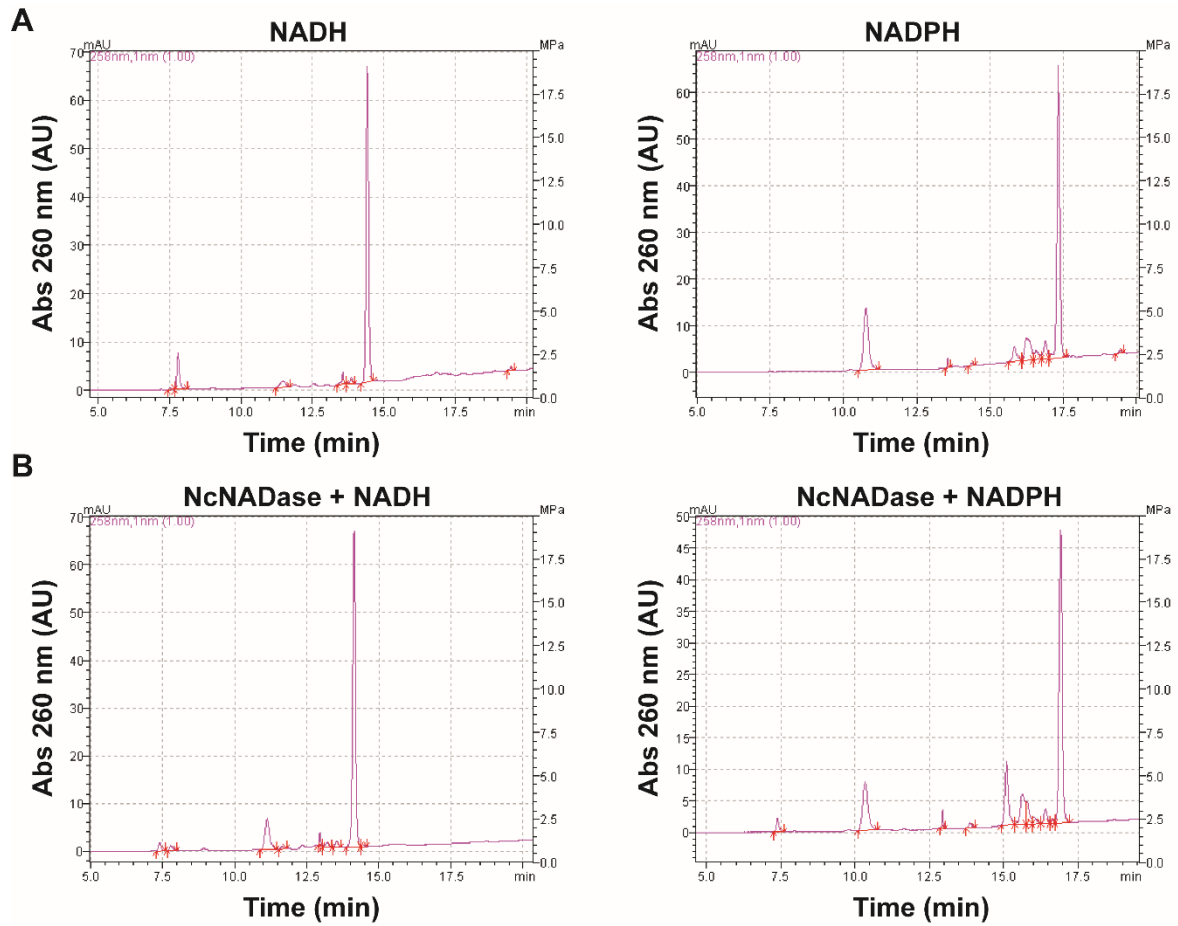

**Supplementary Figure 4. HPLC elution profiles of NADH, NADPH and *NcNADase* hydrolysis products.** (A) NADH and NADPH standards (B) NADH and NADPH incubated with *NcNADase* expressed and purified from 293 cells. The experiment was repeated independently three times with similar results.

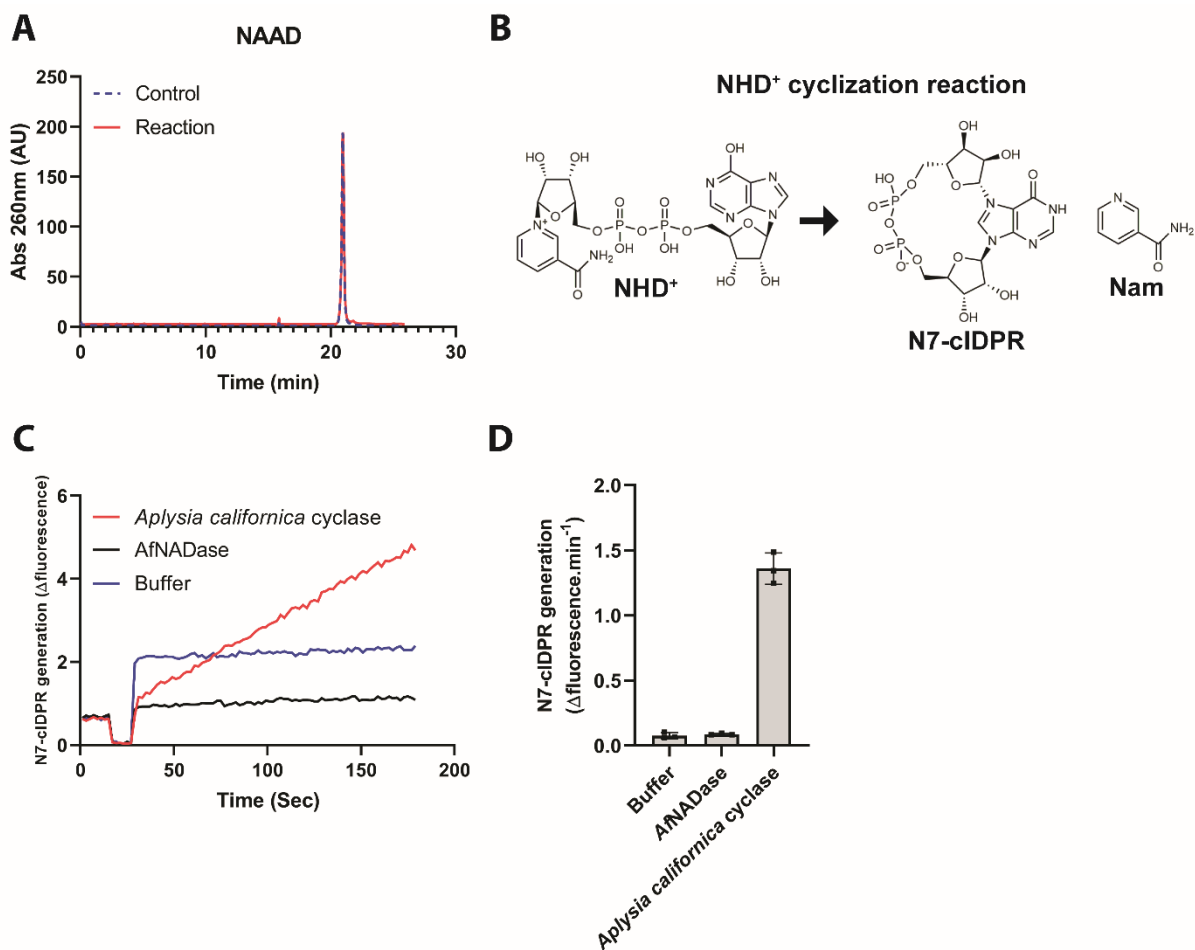

**Supplementary Figure 5. *Af*NADase does not cleave NAAD or catalyse ADPR cyclization.** (A) No *Af*NADase mediated reaction is observed with NAAD as shown by HPLC analysis. (B) Cyclization of NHD<sup>+</sup> leads to the formation of Nam and the fluorescent molecule N7-cIDPR. (C) N7-cIDPR is produced by *Aplysia californica* cyclase but not by *Af*NADase, as evidenced by fluorescence measurements, n=3. (D) Rate of N7-cIDPR formation by *Af*NADase and *A. californica* cyclase. Data are presented as mean values +/- SEM. The *A. californica* cyclase was used as a positive control. Experiments in A, C and D were performed independently three times with similar results. Source data are provided as a Source Data file.

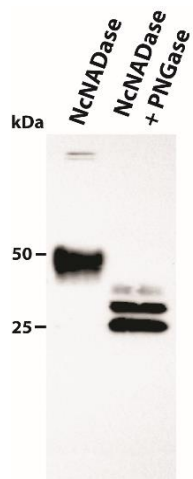

**Supplementary Figure 6. Recombinant *N. crassa* NADase is N-glycosylated.** Deglycosylation of purified FLAG-tagged NcNADase expressed in 293 cells with Peptide-N-Glycosidase F (PNGase) reduces the molecular mass of the protein, shown by western blotting using Anti-FLAG M2 antibody. The experiment was repeated independently three times with similar results. Source data are provided as a Source Data file.

|                                      |     |                                                            |     |
|--------------------------------------|-----|------------------------------------------------------------|-----|
| <i>Aspergillus fumigatus</i> /1-234  | 1   | -----MIFTNAILVISALLPATVLSL-----                            | 21  |
| <i>Aspergillus ruber</i> /1-212      | 1   | -----MF-----                                               | 2   |
| <i>Neurospora crassa</i> /1-243      | 1   | -----MKFT-LLSTAVALLTSTAVALPTSSSSA-----G-----SLLNER         | 34  |
| <i>Fusarium sp_AF-&amp;/1-225</i>    | 1   | -----MRISFFLSSL--LWLSTASALPTS-----LDE-                     | 25  |
| <i>Streptomyces glauciniger</i> /1-2 | 1   | --MKRRQRIS--LSTLPALLVLLVGTLLGTVTSAHAEDWGGP-----AQLAAP      | 44  |
| <i>Mycobacterium tuberculosis</i> /1 | 1   | MRFRRRGTIPAAATLGFTILLTGTAQAAQSSGAQP-----GGP-----CTAPLAES   | 46  |
| <i>Bacillus cereus</i> /1-218        | 1   | -----MPGSMKNV-----GEKIKNIEIPNVFPEP                         | 24  |
| <i>Lentzea guizhouensis</i> /1-212   | 1   | -MILRKHVLSLLVLVSTMLGLAAAPVAHATPSAP-----                    | 33  |
|                                      |     |                                                            |     |
| <i>Aspergillus fumigatus</i> /1-234  | 22  | -----QHTEDSLFP-----ARCWPDPCCAGITFQ                         | 44  |
| <i>Aspergillus ruber</i> /1-212      | 3   | -----ARMQQPTY-----DRCKDNPCAGIPSQ                           | 25  |
| <i>Neurospora crassa</i> /1-243      | 35  | -----SYVNASSTATTCP-----YSRRSPAYCAG-TAQ                     | 61  |
| <i>Fusarium sp_AF-&amp;/1-225</i>    | 26  | -----RKAVGCDCTG-TRN                                        | 38  |
| <i>Streptomyces glauciniger</i> /1-2 | 45  | PGRPAAHGPGPGAAGHGPGREADTPGRVP-----GGPENPRICIGATFT          | 89  |
| <i>Mycobacterium tuberculosis</i> /1 | 47  | TAKIIKQAG-----DCSAQAHRPQAVPATAHAAAAAKDALHARPHACG-----      | 90  |
| <i>Bacillus cereus</i> /1-218        | 25  | SAADVGNVG-----ERKTLGELFSVV-----KSETKDTGNVKGAS              | 60  |
| <i>Lentzea guizhouensis</i> /1-212   | 34  | TAEVV-----CE-----                                          | 40  |
|                                      |     |                                                            |     |
| <i>Aspergillus fumigatus</i> /1-234  | 45  | N----DTYVCGDPRLGPVVLPPQKF-PLNNELRTYARFG-ALCPAEFLDKWATDVA-P | 94  |
| <i>Aspergillus ruber</i> /1-212      | 26  | N----ASYVCGDSRLGPGVGLPSKF-PLSTETSTYARFG-NLCPKEWLDKWTS----  | 72  |
| <i>Neurospora crassa</i> /1-243      | 62  | NRTLSATYICGDSRLGPGVVLPPQFFLPDLDIYDRFG-GLCPGAFLEKWFNQTG--   | 115 |
| <i>Fusarium sp_AF-&amp;/1-225</i>    | 39  | GGPSAKEFICRDSRLGPKVLPKKL-PLDNLVENYDRFG-GLTPGQFLDKWTD-----  | 89  |
| <i>Streptomyces glauciniger</i> /1-2 | 90  | D----PKFFCGDPRLGPRLPQAKG-LLGAMLTDYRRLD-GQNANGFLRTWDFDA---- | 137 |
| <i>Mycobacterium tuberculosis</i> /1 | 91  | ----PPYINGDPRLGPVNLPPQNGYF-GYLLRQYKRYG-GLTPSTFLYQYWDEAKTP  | 140 |
| <i>Bacillus cereus</i> /1-218        | 61  | E----AGKHVDDVKI-PENIKKWNYPPEEL--YKKYE-DVYKNP---KYDQE---    | 103 |
| <i>Lentzea guizhouensis</i> /1-212   | 41  | ----KPFHLGDERFGKDLPPSPSHVAGKLLIGYKRFGEKASPQAFVTEYWKGK---   | 89  |
|                                      |     |                                                            |     |
|                                      |     | Y100 R129 F130 L138 R148                                   |     |
| <i>Aspergillus fumigatus</i> /1-234  | 95  | NGTYIYPPANGFA---LDTEEQPLIGNATLPVGMKLDLRFGEYGFLLAPLGAPYIER  | 148 |
| <i>Aspergillus ruber</i> /1-212      | 73  | DGNLRYPPQDGF---LDNDKNIWGNYTLTAGSKVDRFGSEYKYLTTLGAPYIER     | 126 |
| <i>Neurospora crassa</i> /1-243      | 116 | SGWWDYPPQNGF---VDDEGNIIAANLTQTGTFVDRFGSEYGSFLAPAAAPYLQR    | 169 |
| <i>Fusarium sp_AF-&amp;/1-225</i>    | 90  | KGNFIYPPQNGFQ---LDKNGNAINGTMELOKQALVDRFGSEYGSFISAAAAPYSQR  | 143 |
| <i>Streptomyces glauciniger</i> /1-2 | 138 | ANSYKFPDDGF---PGGPVAVI---NLAVGQRIDRFGGEGGRFLAPAGSPYAQR     | 187 |
| <i>Mycobacterium tuberculosis</i> /1 | 141 | TPDWRYPDDGFVHQLKIDNSRPARYKVTLRVGGQVDRFGAEAGRFIAPGGASFGSR   | 197 |
| <i>Bacillus cereus</i> /1-218        | 104 | TGEIHWPPNDGFV-----SGTKQVETLHPGMKLDRYGNPTGSFLAPESDSFPSR     | 152 |
| <i>Lentzea guizhouensis</i> /1-212   | 90  | --GWKYPENDGFI-----GRPT--TEVLAPGKLLDRFYGGSGRFLSPVGTPTFAQR   | 135 |
|                                      |     |                                                            |     |
|                                      |     | F158                                                       |     |
| <i>Aspergillus fumigatus</i> /1-234  | 149 | SLPPSNLNT--FDGMY-----PYNHYVYQVTKEFVVGGLPIAPWFEQPGMGT       | 193 |
| <i>Aspergillus ruber</i> /1-212      | 127 | ALPPGNLDT--YDGKY-----PYNHYVYEVLKDQVNVVGPVAAWFEQPGMGT       | 171 |
| <i>Neurospora crassa</i> /1-243      | 170 | SLPPSNLNG--DAKF-----PWNYHVSIVIKPFAVLAGPIAPWFGQPGQV         | 213 |
| <i>Fusarium sp_AF-&amp;/1-225</i>    | 144 | ALPPSNLATNPPSPNF-----PYNHYVYRVLKALPVVGGPIAPWFGQPGGLGA      | 190 |
| <i>Streptomyces glauciniger</i> /1-2 | 188 | SIAPSNLNT--FDPGY-----PFNYHLYKVVRSFAVSAAGPVAPFYGQPGNGL      | 232 |
| <i>Mycobacterium tuberculosis</i> /1 | 198 | ALPPNLLNTRSDDP SHLCN-----YHLYRVSKRFSVDGGPTTEPAFQPGPGRGL    | 244 |
| <i>Bacillus cereus</i> /1-218        | 153 | ALAPHSEQA-----P--YVYEV IADFEVTSK IAPWFDQPGGGT              | 190 |
| <i>Lentzea guizhouensis</i> /1-212   | 136 | SLPPQSLNT-----CEYEQGVMPYGYRYKVEKQFEVLGQPAAKWFGQTGGGR       | 184 |
|                                      |     |                                                            |     |
|                                      |     | Q194                                                       |     |
| <i>Aspergillus fumigatus</i> /1-234  | 194 | GFVITY-----NVLGLIDDGYLR-----RLDESEYDEKVEYSNPYTPGPNQ-       | 234 |
| <i>Aspergillus ruber</i> /1-212      | 172 | OIYTSK-----AVNELLEGGFLR-----RLSEDEYDERNEYAEPAPRGQDA-       | 212 |
| <i>Neurospora crassa</i> /1-243      | 214 | OYQTYE-----NVATLIADGYLKAEDPQRLVPRNY-----                   | 243 |
| <i>Fusarium sp_AF-&amp;/1-225</i>    | 191 | QFFTGEV-----GNIMALIEKGYLESVDPSVLI-----FRGKGCA              | 225 |
| <i>Streptomyces glauciniger</i> /1-2 | 233 | OYVLP LG-----DSVANHITNGDLI-----RLN-----                    | 255 |
| <i>Mycobacterium tuberculosis</i> /1 | 245 | OYVLSAYVPGAPHLTVKWLADKGYLQ-----RVY-----                    | 275 |
| <i>Bacillus cereus</i> /1-218        | 191 | OIKYK---PNG-RTYSIEELEIELEIK-----QIKP-----                  | 218 |
| <i>Lentzea guizhouensis</i> /1-212   | 185 | OYKVTS---PNPPERRNVAVLVENGYLS-----VVR-----                  | 212 |

**Supplementary Figure 7. Multiple sequence alignment of fungal and bacterial TNT domain-containing proteins.** Multiple sequence alignment of selected TNT-containing proteins using MAFFT. Residues involved in BAD and/or product interaction in AfNADase are highlighted.

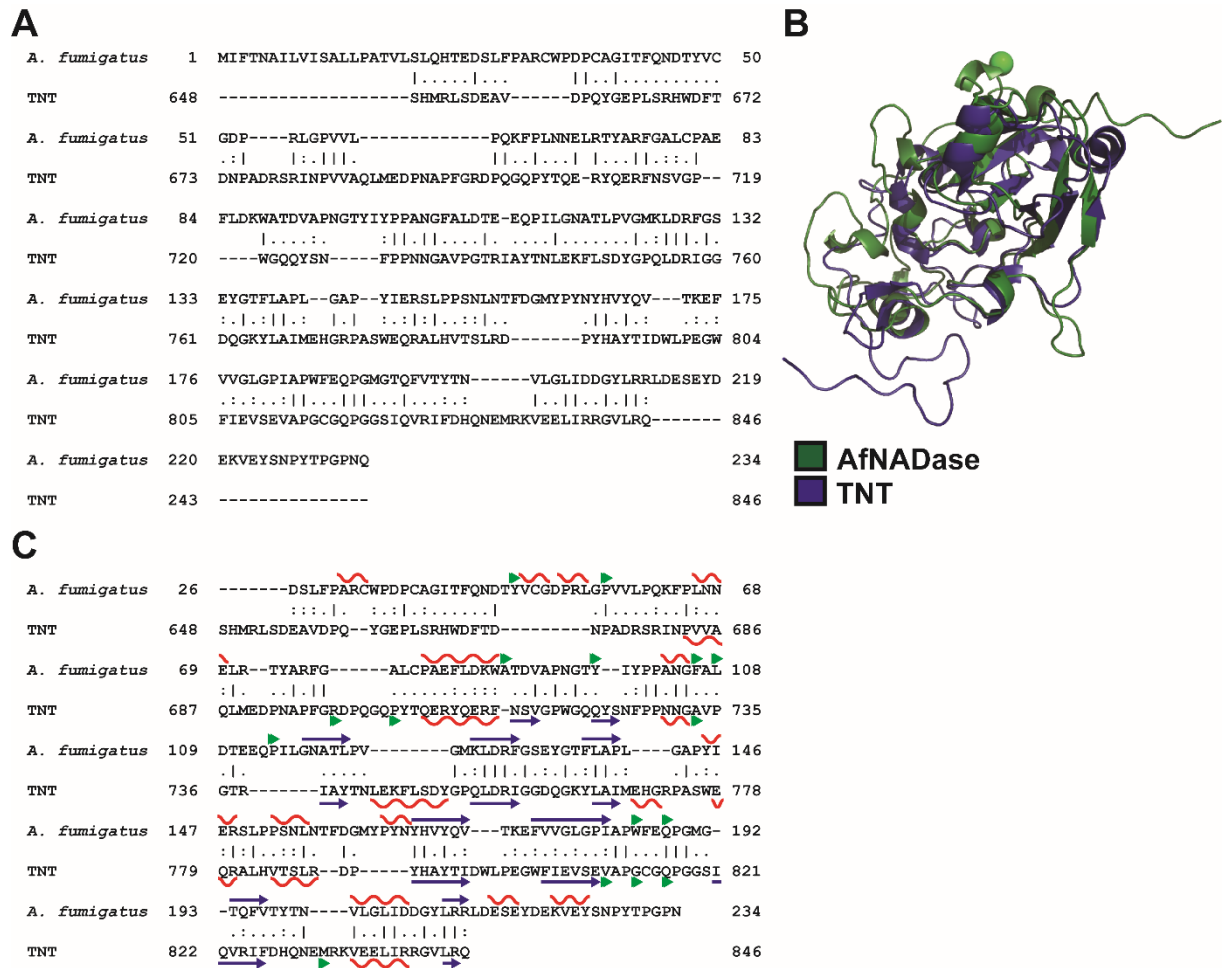

**Supplementary Figure 8. Pairwise and structural alignment of AfNADase and TNT.** (A) Global pairwise alignment of AfNADase and the TNT domain of *Mtb* CpnT using EMBOSS Needle. (B) Structural alignment of AfNADase and the TNT domain of *Mtb* CpnT. (C) Structure-based sequence alignment of AfNADase and the TNT domain of *Mtb* CpnT. Secondary structure elements were assigned using the DSSP algorithm, the red waves indicate helical secondary structure while the blue arrows and green arrowheads indicate beta strands and beta bridges, respectively.

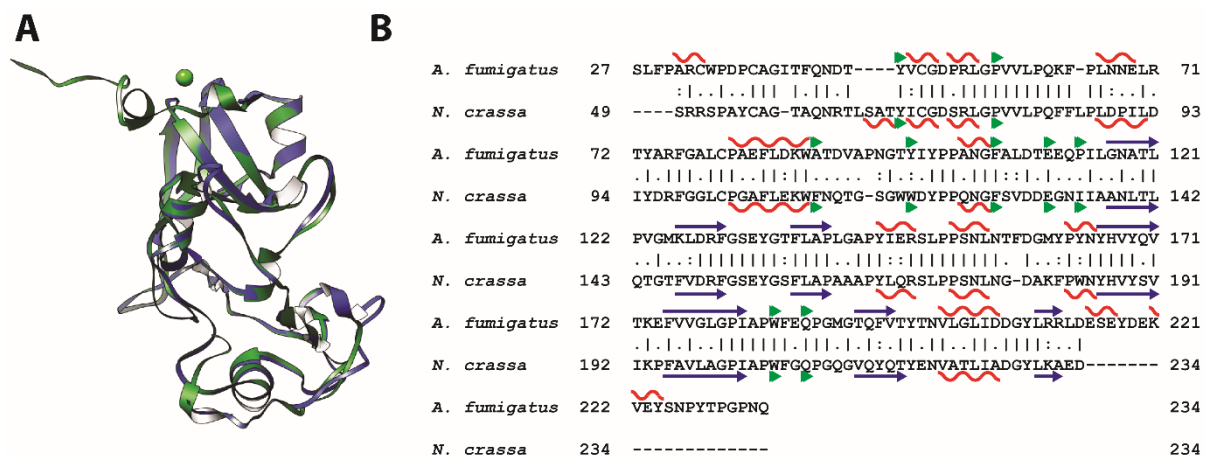

**Supplementary Figure 9. Structural alignment of AfNADase and NcNADase** (A) Structural alignment of AfNADase (green) and the model of NcNADase (blue). (B) Structure-based sequence alignment of AfNADase and the model of NcNADase. Secondary structure elements were assigned using the DSSP algorithm; the red waves indicate helical secondary structure while the blue arrows and green arrowheads indicate beta strands and beta bridges, respectively.
