# Supplementary material for: Discovery of fungal surface NADases predominantly present in pathogenic species
Source: PubMed Central journal article supplement (PMC7955114; doi:10.1038/s41467-021-21307-z), 2021-03-12
Supplement: 41467_2021_21307_MOESM3_ESM.pdf [file 41467_2021_21307_MOESM3_ESM.pdf]

### **Description of Additional Supplementary Files**

File Name: Supplementary Data 1

Description: Proteins identified by mass spectrometry in fluorescent bands excised from the activity gels in Figure 1D.
